# Supplementary material for: Observation of microporous cesium salts of 12-tungstosilicic acid using scanning transmission electron microscopy
Source: Royal Society of Chemistry journal article supplement (doi:10.1039/c5cc01842k), 2015-01-01
Supplement: c5cc01842k1.pdf [file c5cc01842k1.pdf]

## Electronic Supplementary Information

### Observation of microporous cesium salts of 12-tungstosilicic acid by scanning transmission electron microscopy

Norihito Hiyoshi<sup>a\*</sup> and Yuichi Kamiya<sup>b</sup>

<sup>a</sup> National Institute of Advanced Industrial Science and Technology (AIST), 4-2-1 Nigatake, Miyagino, Sendai 983-8551, Japan

<sup>b</sup> Research Faculty of Environmental Earth Science, Hokkaido University, Nishi 5, Kita 10, Kita-ku, Sapporo 060-0810, Japan

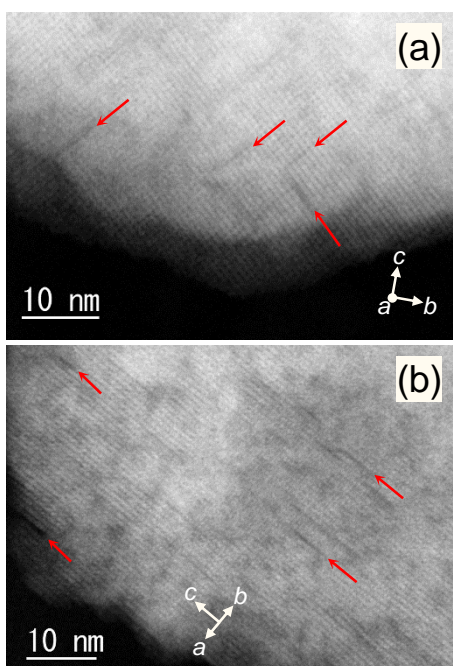

**Fig. S1** Low-pass filtered HAADF images of **Cs<sub>2.5</sub>** taken along the [100] (a) and [110] (b) directions. Red arrows indicate dark lines parallel to the {110} planes.

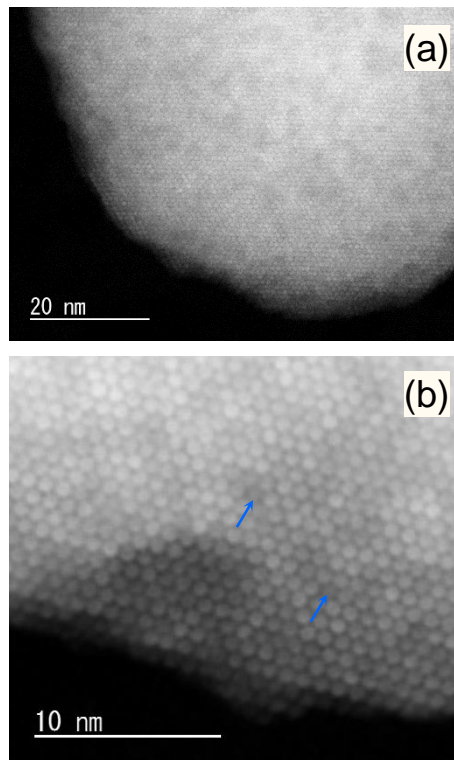

**Fig. S2** Low-pass filtered HAADF images of **Cs<sub>4.0</sub>** taken along the [111] direction at low (a) and high (b) magnification. Dark lines are not observed in the HAADF images of **Cs<sub>4.0</sub>**. Blue arrows indicate anion columns darker than the surrounding six anion columns.

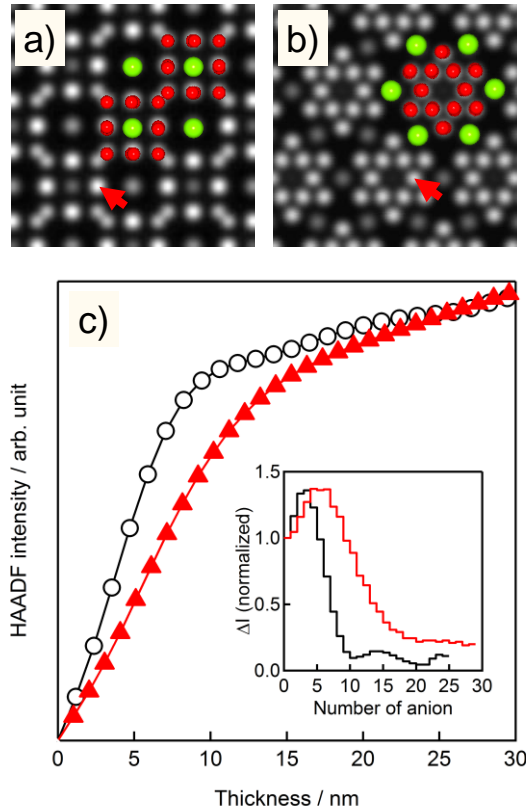

**Fig. S3** Simulation of HAADF images of  $\text{Cs}_4\text{SiW}_{12}\text{O}_{40}$ . (Anion vacancies were not introduced in the structure model.) (a) [100] projection. (b) [111] projection. Green and red circles indicate the position of Cs and W, respectively. (c) HAADF intensity of W atomic columns arrowed in image a ( $\circ$ ) and image b ( $\blacktriangle$ ) as a function of crystal thickness. The interval of points plotted corresponds to the distance of  $[\text{SiW}_{12}\text{O}_{40}]^{4-}$  anions along with the direction of incidence. The inset is the differential of the HAADF intensity in which the x-axis is changed to the number of  $[\text{SiW}_{12}\text{O}_{40}]^{4-}$  anions stacked: black line, [100]; red line, [111].
